# Supplementary material for: Prognostic value of high-sensitivity cardiac troponin for major adverse cardiovascular events in patients with diabetes: a systematic review and meta-analysis
Source: PeerJ. 2023 Nov 13;11:e16376. doi: 10.7717/peerj.16376 (PMC10652853; doi:10.7717/peerj.16376)
Supplement: Supplemental Information 4 [file peerj-11-16376-s004.xlsx]

## Sheet: baseline
																		Newcastle-Ottawa quality assessment Score details
Author	Year	Patient source	Study design	Subunit of hs-cTn (Assay)	Coding of hs-cTn	Median hs-cTn in ng/L (IQR)		Population	HbA1c (%)		Fasting blood glucose (mg/dL)	Number of participants	Age	Male (%)	Duration of follow-up (years)	Outcomes of interest	Adjusted covariates	Representativeness	Selection	Ascertainment	Outcome of interest	Comparability	Assessment of outcome	FU length	Adequate FU	Total score
Witkowski	2021	Cleveland Clinic GeneBank Study (2001-2007)	prospective	hs-cTnT (Roche Diagnostics)	Quartiles (8.2/13/21.6 ng/L)	13 (8.2-21.6)		Prediabetes	5.8 (5.5-6.0)		103.2 (95.2–110)	2631	65±11.2	72.4	5 years	MACE, all-cause mortality	Demographics, cardiovascular risk factors	1	1	1	1	2	1	1	0	8
Saeed	2021	Nationwide Norway study (2002-2003)	retrospective	hs-cTnT (Roche Diagnostics)	Continuous (HR per SD)	4.0±4.8		T1DM	8.2 (1.2)		NA	295	32.7 (20.9–44.0)	54	14.4 (0.5–16) years	Incidence IHD event	Systolic blood pressure, albuminuria, and HbA1c	1	1	1	1	1	1	1	0	7
Pandey	2021	ARIC study (1990-1992), DHS study (2000-2002), MESA study (2000-2002)	prospective	hs-cTnT (Roche Diagnostics)	Continuous (HR per SD); binary (6 ng/L)	3.0 (1.5, 6.0)		Prediabetes	NA		106 (102-111)	4543	57 (51-63)	51.2	10 years	Heart failure	Demographics, cardiovascular risk factors, medication use, study cohort, biomarker levels	1	1	1	1	2	1	1	0	8
Pandey	2021	ARIC study (1990-1992), DHS study (2000-2002), MESA study (2000-2002)	prospective	hs-cTnT (Roche Diagnostics)	Continuous (HR per SD); binary (6 ng/L)	5.0 (1.5, 8.9)		Diabetes	NA		148 (128-191)	2256	58 (53-64)	46.8	10 years	Heart failure	Demographics, cardiovascular risk factors, medication use, study cohort, biomarker levels	1	1	1	1	2	1	1	0	8
Cimaglia	2021	Maria Cecilia Hospital (Cotignola, Italy)	prospective	hs-cTnT (Roche Diagnostics)	Binary (≥25 ng/L）	31 (20–59)		Diabetes with critical limb ischemia	7.3 (6.4-8.4)		NA	618	73 (65-80)	72	981 (557–1325) days	MACE, all-cause mortality	Comorbidities	1	1	1	0	1	1	1	0	6
Busch	2021	Thousand&2 study	prospective	hs-cTnI (Snibe Diagnostics)	Continuous (HR per SD)	2.4 (1.0, 5.1)/2.6 (1.0, 5.6)		T2DM	7.4 ± 1.4/7.7 ± 1.7		NA	1030	65.5 (58.8-71.4)	65.9	4.7 (4.0-5.3) years	MACE	NA	1	1	1	1	0	1	1	0	6
Bluro	2021	Hospital Italiano de Buenos Aires (2013-2017)	prospective	hs-cTnT (Roche Diagnostics)	Continuous (HR per SD); Binary (14ng/L)	9 (6-13)		T2DM	7.8 (7.1-9.1)		169 (151-205)	482	65 (55-72)	56.3	2.5 years	MACE, all-cause mortality, stroke	Age, eGFR	1	1	1	1	1	1	1	0	7
Tang	2020	ARIC study (2011-2013)	prospective	hs-cTnI (Abbott Diagnostics)	Continuous (HR per log2); binary (≥9.2 ng/L）	2.8 (1.9, 4.5)/4.3 (2.8, 7.7)		Diabetes	6.5 ± 1.0/6.7 ± 1.1		NA	1835	75.5±5.1	43	6.2 years	All-cause mortality	NA	1	1	1	1	0	1	1	0	6
Tang	2020	ARIC study (2011-2013)	prospective	hs-cTnT (Roche Diagnostics)	Continuous (HR per log2); binary (≥24 ng/L）	10.0 (7.0, 14.0)/14.0 (9.0, 22.0)		Diabetes	6.5 ± 1.0/6.7 ± 1.1		NA	1835	75.5±5.1	43	6.2 years	All-cause mortality	NA	1	1	1	1	0	1	1	0	6
Sharma	2020	EXAMINE trial	prospective	hs-cTnI (Abbott Diagnostics)	Continuous (HR per log2)	9		T2DM with recent ACS	NA		NA	5154	60.9±9.9	67.7	18 months	MACE	Demographics, cardiovascular risk factors, biomarker levels	1	1	1	0	2	1	0	0	6
Nguyen	2020	MESA study	prospective	hs-cTnT (Roche Diagnostics)	Continuous (HR per SD); Binary (≥4.5 ng/L）	7.1±7.8		Prediabetes	NA		NA	799	64.3±9.9	57.7	12.4±3.8 years	Incidence IHD event, Heart failure	Demographics, cardiovascular risk factors, biomarker levels	1	1	1	1	2	1	1	0	8
Nguyen	2020	MESA study	prospective	hs-cTnT (Roche Diagnostics)	Continuous (HR per SD); Binary (≥4.5 ng/L）	10.5±16.2		Diabetes	NA		NA	695	64.8±9.6	52.5	12.4±3.8 years	Incidence IHD event, Heart failure	Demographics, cardiovascular risk factors, biomarker levels	1	1	1	1	2	1	1	0	8
Costacou (gender subgroup)	2020	EDC study	prospective	hs-cTnT (Roche Diagnostics)	Continuous (HR per SD)	5.0 (<3.0,10.0)		T1DM	8.7 (7.9, 9.8)		NA	581	28.4 (22.6, 34.8)	48.1	20.3 years	MACE	Cardiovascular risk factors, biomarker levels	1	1	1	1	2	1	1	0	8
Wong	2019	Cardiac Clinic, Queen Mary Hospital (2003-2014)	prospective	hs-cTnI (Abbott Diagnostics)	Continuous (HR per SD)	2.2 ± 1.1		T2DM with stable CAD	7.38 ± 1.36		NA	1617	67.7 ± 10.5	72	51 months	MACE	Demographics, cardiovascular risk factors, enrollment period	1	1	1	0	2	1	1	0	7
Keller	2018	German Diabetes and Dialysis Study (4D)	prospective	hs-cTnT (Roche Diagnostics)	Quartiles (35/55/90 ng/L)	55 (35-90)		T2DM with hemodialysis	6.74±1.22		NA	1034	67±8	53.2	4.04 (3.89-4.20) years	Incident CVD, all-cause mortality	cardiovascular risk factors, dialysis-related factors	1	1	1	0	2	1	1	1	8
Colombo	2018	CARDS trial	prospective	hs-cTnT (Glasgow Biomarker Laboratory)	Continuous (HR per SD)	1.5 (1.5-5.5)/4.1 (1.5-9.1)		T2DM	7.7 (6.8-8.7)/7.6 (6.9-8.4)		NA	2105	62.9 (39.2-77.3)	67.6	4.1 (3.3-4.7) years	Incident CVD	Demographics, cardiovascular risk factors, medication use, biomarker levels	1	1	1	1	2	1	1	0	8
Price	2017	ET2DS study	prospective	hs-cTnT (Roche Diagnostics)	Continuous (OR per SD)	9.6 (6.9-13.8)		T2DM	NA		NA	1049	67.9±2.4	49.1	8 years	Incident CVD	Cardiovascular risk factors, biomarker levels	1	1	1	1	2	1	1	0	8
Ohkuma	2017	ADVANCE trial	prospective	hs-cTnT (Roche Diagnostics)	Continuous (HR per SD)	5.0 (1.5, 10.0)		T2DM	7.4 (1.4)		NA	3098	67±7	60	5 years	Heart failure	Demographics, cardiovascular risk factors, medication use, biomarker levels	1	1	1	0	2	1	1	0	7
Galsgaard	2017	Steno Diabetes Center in Denmark (1993-2000)	prospective	hs-cTnT (Roche Diagnostics)	Continuous (HR per doubling)	3.14 (1.1–6.0)		T1DM without nephropathy	8.4 (1.1)		NA	442	45.4 (11.4)	53	8.1 (6.6–12.6) years	Incident CVD, all-cause mortality	Demographics, cardiovascular risk factors, biomarker levels	1	1	1	1	2	1	1	0	8
Galsgaard	2017	Steno Diabetes Center in Denmark (1993-2000)	prospective	hs-cTnT (Roche Diagnostics)	Continuous (HR per doubling)	8.9 (4.1–17.2)		T1DM with nephropathy	9.4 (1.5)		NA	458	42.1 (10.5)	61	8.1 (6.6–12.6) years	Incident CVD, all-cause mortality	Demographics, cardiovascular risk factors, biomarker levels	1	1	1	1	2	1	1	0	8
Bidadkosh	2017	Sun-MACRO trial	prospective	hs-cTnT (Roche Diagnostics)	Continuous (HR per doubling)	30 (20-47)		T2DM with nephropathy	8.0±1.6		NA	861	64±9	76	9 (4-17) months	Incidence CVD event	Demographics, cardiovascular risk factors, biomarker levels	1	1	1	1	2	1	1	0	8
Scirica	2016	SAVOR-TIMI 53 study (2010-2013)	prospective	hs-cTnT (Roche Diagnostics)	Continuous (HR per SD)	12.0 (8.1-18.4)		T2DM	7.6 (6.9, 8.7)		145.0 (118.0, 182.0)	16492	65.0± 8.5	66.9	2.1(1.8-2.3) years	MACCE, Cardiovascular death,myocardial infarction, ischemic stroke, and hospitalization for heart failure (HF)	Demographics, cardiovascular risk factors, biomarker levels	1	1	1	0	2	1	1	0	7
Resl	2016	Vienna’s General Hospital and Hietzing Hospital Vienna (2005-2008)	prospective	hs-cTnT (Roche Diagnostics)	Continuous (HR per SD)	0.0008 (0.005–0.013)		T2DM	7.3±1.1/7.1±1.2		NA	746	55±13/66±10	56.3	60 (60-60) months	Composite endpoint of unplanned hospitalisation for cardiovascular disease or death	Demographics, cardiovascular risk factors, biomarker levels	1	1	1	1	2	1	1	0	8
Junttila	2016	BARI study	prospective	hs-cTnT (NA)	Binary (≥14 ng/L）	NA		T2DM	NA		NA	2285	NA	NA	5 years	Composite endpoint of cardiovascular death, myocardial infarction and stroke	A multitude of clinical variables including quantitative measure of CAD severity	1	1	1	0	2	1	1	0	7
Hendriks	2016	ZODIAC study（1998-2001）	prospective	hs-cTnT (NA)	Continuous (HR per SD); tertiles(3/14 ng/L)	NA		T2DM	7.2 (1.3)/7.3 (1.3)/7.4 (1.4)		NA	1133	67±12	45	11 (7-14) years	All-cause mortality, cardiovascular mortality	Demographics, cardiovascular risk factors, medication use, biomarker levels	1	1	1	1	2	1	1	0	8
Gori	2016	ARIC study (1996–1998)	prospective	hs-cTnT (Roche Diagnostics)	Continuous (HR per SD)	6 (3, 10)		Diabetes	NA		NA	1510	63±6	48	13.1 (6.9-14.4) years	Incident CVD	Demographics, cardiovascular risk factors, medication use, biomarker levels	1	1	1	1	2	1	1	0	8
Looker	2015	Go-DARTS study, SDR study, MONICA/KORA study , [IMT] IMPROVE study and Stockholm 60-year Old Study	prospective	hs-TnT(RBM)	Continuous (OR per SD)	NA		T2DM	6.9 (6.5, 7.5)/7.0 (6.6, 7.8)		NA	2318	68.4 (61.3, 74.4)/68.8 (61.3, 76.5)	57.1	3.2(1.5–4.9)/6.5(3.9–7.9) years	Incident CVD	Demographics, cardiovascular risk factors, medication use, biomarker levels	1	1	1	1	2	1	1	0	8
Zellweger	2015	APACE study (2006-2012)	prospective	hs-cTnT (Roche Diagnostics)	Binary (14ng/L); Continuous (HR per SD) from KM curves	9.0 (5.0–22.4)		Diabetes with suspected AMI	NA		NA	379	70 (59–77)	71.5	814 days	All-cause mortality	AMI, unstable angina, cardiac disease other than CAD, non-cardiac disease, and unknown cause of acute chest pain.	1	1	1	0	2	1	1	1	8
Hillis	2014	Preterax and Diamicron Modified Release Controlled Evaluation (ADVANCE) study	prospective	hs-cTnT (Roche Diagnostics)	Continuous (HR per SD)	5.0 (1.5-11.0)		T2DM	7.41 ± 1.43		NA	3862	66.89±6.61	61	5 years	Cardiovascular events,all-cause mortality	Demographics, cardiovascular risk factors, medication use, biomarker levels	1	1	1	0	2	1	1	0	7
Yiu	2014	CDATS study	prospective	hs-TnI (Abbott)	Binary (male: 8.5 ng/L, female: 7.6 ng/L); Continuous (HR per SD) from KM curves	4.8 [3.2-8.4 ]		T2DM	7.8 ± 1.4		NA	276	64.4 ± 10.0	57	4.9 (3.7-5.6) years	MACE,heart failure,myocardial infarction,cardiovascular mortality	Demographics, cardiovascular risk factors	1	1	1	0	2	1	1	0	7
												62419

## Sheet: MACE
Author	Year	Subunit of hs-cTn (Assay)	Coding of hs-cTn	Population	sample size	outcome at beginning	Adjusted	MACE (CVD+mortality)
								HR	95%CI ll	95%CI ul	ln(HR)	SE(ln(HR))
Bluro	2021	hs-cTnT (Roche Diagnostics)	Binary (14 ng/L)	T2DM	482	1	1	2.58	0.95	7.06	0.947789	1.96562
Bidadkosh	2017	hs-cTnT (Roche Diagnostics)	Continuous (HR per doubling)	T2DM with nephropathy	861	1	2	1.25	0.92	2.3	0.223144	0.897965
Cimaglia	2021	hs-cTnT (Roche Diagnostics)	Binary (25 ng/L）	T2DM with CLI	618	0	1	2.29	1.21	4.34	0.828552	1.25171
Bluro	2021	hs-cTnT (Roche Diagnostics)	Continuous (HR per SD)	T2DM	482	1	1	1.04	1	1.08	0.0392207	0.0754218
Busch	2021	hs-cTnI (Snibe Diagnostics)	Continuous (HR per SD)	T2DM	1030	1	0	1.12	0.79	1.59	0.113329	0.685467
Gori	2016	hs-cTnT (Roche Diagnostics)	Binary (14 ng/L)	Diabetes	1510	1	2	1.96	1.57	2.46	0.672944	0.440104
Colombo	2018	hs-cTnT (Glasgow Biomarker Laboratory)	Continuous (HR per SD)	T2DM	2105	1	2	1.4	1.16	1.69	0.336472	0.368782
Costacou (gender subgroup)	2020	hs-cTnT (Roche Diagnostics)	Continuous (HR per SD)	T1DM	581	1	2	1.23	0.97	1.15	0.207014	0.166817
Galsgaard	2017	hs-cTnT (Roche Diagnostics)	Continuous (HR per doubling)	T1DM without nephropathy	442	1	2	1.06	0.92	1.21	0.0582689	0.268522
Hendriks	2016	hs-cTnT (NA)	Binary (3 ng/L）	T2DM	1133	1	2	1.4	0.94	2.07	0.336472	0.773636
Galsgaard	2017	hs-cTnT (Roche Diagnostics)	Continuous (HR per doubling)	T1DM with nephropathy	458	1	2	1.14	1.02	1.26	0.131028	0.207083
Hendriks	2016	hs-cTnT (NA)	Continuous (HR per SD)	T2DM	1133	1	2	1.14	0.99	1.3	0.131028	0.266966
Junttila	2016	hs-cTnT (NA)	Binary (14 ng/L)	T2DM	2285	0	2	1.85	1.48	2.32	0.615186	0.440535
Hillis	2014	hs-cTnT (Roche Diagnostics)	Continuous (HR per SD)	T2DM	3862	0	2	1.29	1.17	1.42	0.254642	0.18978
Looker	2015	hs-TnT(RBM)	Continuous (OR per SD)	T2DM	2318	1	2	1.57	1.4	1.78	0.451076	0.235338
Nguyen	2020	hs-cTnT (Roche Diagnostics)	Continuous (HR per SD)	Prediabetes	799	1	2	1.24	1.04	1.48	0.215111	0.345765
Nguyen	2020	hs-cTnT (Roche Diagnostics)	Continuous (HR per SD)	Diabetes	695	1	2	1.39	1.22	1.6	0.329304	0.26573
Price	2017	hs-cTnT (Roche Diagnostics)	Continuous (OR per SD)	T2DM	1049	1	2	1.35	1.02	1.49	0.300105	0.371394
Resl	2016	hs-cTnT (Roche Diagnostics)	Continuous (HR per SD)	T2DM	746	1	2	1.57	1.25	1.98	0.451076	0.450754
Saeed	2021	hs-cTnT (Roche Diagnostics)	Continuous (HR per SD)	T1DM	295	1	1	1.23	0.98	1.55	0.207014	0.449288
Keller	2018	hs-cTnT (Roche Diagnostics)	Binary (35 ng/L)	T2DM with hemodialysis	1034	0	2	1.35	1.01	1.82	0.300105	0.577108
Scirica	2016	hs-cTnT (Roche Diagnostics)	Continuous (HR per SD)	T2DM	16492	0	2	1.41	1.32	1.51	0.34359	0.131788
Nguyen	2020	hs-cTnT (Roche Diagnostics)	Binary (4.5 ng/L）	Prediabetes/Diabetes	1494	1	2	1.48	1	2.18	0.392042	0.763738
Witkowski	2021	hs-cTnT (Roche Diagnostics)	Binary (13 ng/L)	Prediabetes	2631	1	2	1.65	1.14	2.39	0.500775	0.72546
Sharma	2020	hs-cTnI (Abbott Diagnostics)	Continuous (HR per log2)	T2DM with recent ACS	5154	0	2	1.04	1	1.09	0.0392207	0.0844541
Wong	2019	hs-cTnI (Abbott Diagnostics)	Continuous (HR per SD)	T2DM with stable CAD	1617	0	2	1.75	1.41	2.17	0.559616	0.422515
Yiu	2014	hs-cTnI (Abbott Diagnostics)	Binary (male: 8.5 ng/L, female: 7.6 ng/L)	T2DM	276	0	2	2.85	1.15	7.03	1.04732	1.77422
					51582

## Sheet: HF
Author	Year	Subunit of hs-cTn (Assay)	Coding of hs-cTn	Population	sample size	outcome at beginning	Adjusted	Heart failure
								HR	95%CI ll	95%CI ul	ln(HR)	SE(ln(HR))
Nguyen	2020	hs-cTnT (Roche Diagnostics)	Continuous (HR per SD)	Prediabetes	799	1	2	1.17	0.85	1.61	0.157004	0.625978
Pandey	2021	hs-cTnT (Roche Diagnostics)	Binary (6 ng/L)	Prediabetes	4543	1	2	1.41	1.14	1.73	0.34359	0.408751
Nguyen	2020	hs-cTnT (Roche Diagnostics)	Continuous (HR per SD)	Diabetes	695	1	2	1.63	1.36	1.96	0.48858	0.358151
Pandey	2021	hs-cTnT (Roche Diagnostics)	Binary (6 ng/L)	Diabetes	2256	1	2	1.69	1.37	2.08	0.524729	0.409206
Ohkuma	2017	hs-cTnT (Roche Diagnostics)	Continuous (HR per SD)	T2DM	3098	0	2	1.12	0.94	1.34	0.113329	0.347454
Pandey	2021	hs-cTnT (Roche Diagnostics)	Continuous (HR per SD)	Prediabetes	4543	1	2	1.19	1.08	1.32	0.173953	0.196657
Nguyen	2020	hs-cTnT (Roche Diagnostics)	Binary (≥4.5 ng/L）	Diabetes	695	1	2	5.21	1.54	17.65	1.65058	2.39017
Pandey	2021	hs-cTnT (Roche Diagnostics)	Continuous (HR per SD)	Diabetes	2256	1	2	1.42	1.28	1.57	0.350657	0.200131
Scirica	2016	hs-cTnT (Roche Diagnostics)	Continuous (HR per SD)	T2DM	16492	0	2	1.39	1.26	1.55	0.329304	0.203
Yiu	2014	hs-TnI (Abbott)	Binary (male: 8.5 ng/L, female: 7.6 ng/L)	T2DM	276	0	2	4.88	1.12	21.31	1.58515	2.88693
					35653

## Sheet: mortality
Author	Year	Subunit of hs-cTn (Assay)	Coding of hs-cTn	Population	sample size	outcome at beginning	Adjusted	All-cause mortality
								HR	95%CI ll	95%CI ul	ln(HR)	SE(ln(HR))
Bluro	2021	hs-cTnT (Roche Diagnostics)	Binary (14ng/L)	T2DM	482	1	1	4.65	0.94	23	1.53687	3.13342
Cimaglia	2021	hs-cTnT (Roche Diagnostics)	Binary (≥25 ng/L）	T2DM with CLI	618	0	1	2.76	1.32	5.75	1.01523	1.44214
Hendriks	2016	hs-cTnT (NA)	Binary (≥3 ng/L）	T2DM	1133	1	2	1.44	1.13	1.83	0.364643	0.472456
Keller	2018	hs-cTnT (Roche Diagnostics)	Binary (35ng/L)	T2DM with hemodialysis	1034	0	2	1.5	1.13	2	0.405465	0.559511
Tang	2020	hs-cTnT (Roche Diagnostics)	Binary (25ng/L)	Diabetes	1835	1	0	3.3	1.8	6.2	1.19392	1.21203
Galsgaard	2017	hs-cTnT (Roche Diagnostics)	Continuous (HR per doubling)	T1DM without nephropathy	442	1	2	1.17	0.95	1.44	0.157004	0.407618
Galsgaard	2017	hs-cTnT (Roche Diagnostics)	Continuous (HR per doubling)	T1DM with nephropathy	458	1	2	1.32	1.13	1.54	0.277632	0.303373
Hendriks	2016	hs-cTnT (NA)	Continuous (HR per SD)	T2DM		1	2	1.17	1.07	1.3	0.157004	0.190812
Witkowski	2021	hs-cTnT (Roche Diagnostics)	Binary (8.2 ng/L)	Prediabetes	2631	1	2	1.88	1.21	2.94	0.631272	0.870033
Zellweger	2015	hs-cTnT (Roche Diagnostics)	Binary (14ng/L)	Diabetes with suspected AMI	379	0	2	4.05	1.38	11.91	1.39872	2.11219
Hillis	2014	hs-cTnT (Roche Diagnostics)	Continuous (HR per SD)	T2DM	3862	0	2	1.3	1.18	1.44	0.262364	0.195146
					12874

## Sheet: adjusted
Author	Year	Subunit of hs-cTn (Assay)	Coding of hs-cTn	Population	Adjusted	Outcomes of interest	MACE (CVD+mortality)					All-cause mortality					Heart failure
							HR	95%CI ll	95%CI ul	ln(HR)	SE(ln(HR))	HR	95%CI ll	95%CI ul	ln(HR)	SE(ln(HR))	HR	95%CI ll	95%CI ul	ln(HR)	SE(ln(HR))
Witkowski	2021	hs-cTnT (Roche Diagnostics)	Quartiles (8.2/13/21.6 ng/L)	Prediabetes		MACE, all-cause mortality	2.42	1.69	3.46			3.8	2.55	5.67
Saeed	2021	hs-cTnT (Roche Diagnostics)	Continuous (HR per SD)	T1DM	1	MACE	1.23	0.98	1.55	0.207014	0.449288
Pandey	2021	hs-cTnT (Roche Diagnostics)	Continuous (HR per SD); binary (6 ng/L)	Prediabetes		Heart failure											1.19	1.08	1.32
Pandey	2022	hs-cTnT (Roche Diagnostics)	Continuous (HR per SD); binary (6 ng/L)	Diabetes		Heart failure											1.42	1.28	1.57
Busch	2021	hs-cTnI (Snibe Diagnostics)	Continuous (HR per SD)	T2DM	0	MACE	1.12	0.79	1.59
Tang	2020	hs-cTnI (Abbott Diagnostics)	Continuous (HR per log2); binary (≥9.2 ng/L）	Diabetes		All-cause mortality						3	1.7	5.4
Tang	2020	hs-cTnT (Roche Diagnostics)	Continuous (HR per log2); binary (≥24 ng/L）	Diabetes		All-cause mortality						3.3	1.8	6.2
Sharma	2020	hs-cTnI (Abbott Diagnostics)	Continuous (HR per log2)	T2DM with recent ACS	1	MACE	1.04	1	1.09
Nguyen	2020	hs-cTnT (Roche Diagnostics)	Continuous (HR per SD); Quartiles	Prediabetes	1	MACE, Heart failure	1.24	1.04	1.48								1.17	0.85	1.61
Nguyen	2020	hs-cTnT (Roche Diagnostics)	Continuous (HR per SD); Quartiles	Diabetes	1	MACE, Heart failure	1.39	1.22	1.6								1.63	1.36	1.96
Costacou (gender subgroup)	2020	hs-cTnT (Roche Diagnostics)	Continuous (HR per SD); Quartiles	T1DM	1	MACE	1.23	0.97	1.15
Wong	2019	hs-cTnI (Abbott Diagnostics)	Continuous (HR per SD)	T2DM with stable CAD	1	MACE	1.75	1.41	2.17
Keller	2018	hs-cTnT (Roche Diagnostics)	Quartiles (35/55/90 ng/L)	T2DM with hemodialysis		all-cause mortality, MACE	1.35	1.01	1.82			1.5	1.13	2
Colombo	2018	hs-cTnT (Glasgow Biomarker Laboratory)	Continuous (HR per SD)	T2DM	1	MACE	1.4	1.16	1.69
Price	2017	hs-cTnT (Roche Diagnostics)	Continuous (OR per SD)	T2DM		MACE	1.35	1.02	1.49
Ohkuma	2017	hs-cTnT (Roche Diagnostics)	Continuous (HR per SD)	T2DM		Heart failure											1.12	0.94	1.34
Galsgaard	2017	hs-cTnT (Roche Diagnostics)	Continuous (HR per doubling)	T1DM without nephropathy		MACE, all-cause mortality	1.06	0.92	1.21			1.17	0.95	1.44
Galsgaard	2017	hs-cTnT (Roche Diagnostics)	Continuous (HR per doubling)	T1DM with nephropathy		MACE, all-cause mortality	1.14	1.02	1.26			1.32	1.13	1.54
Bidadkosh	2017	hs-cTnT (Roche Diagnostics)	Continuous (HR per doubling)	T2DM with nephropathy	1	MACE	1.25	0.92	2.3
Scirica	2016	hs-cTnT (Roche Diagnostics)	Continuous (HR per SD)	T2DM	1	MACE, hospitalization for heart failure (HF)	1.41	1.32	1.51								1.39	1.26	1.55
Resl	2016	hs-cTnT (Roche Diagnostics)	Continuous (HR per SD)	T2DM	1	MACE	1.57	1.25	1.98
Junttila	2016	hs-cTnT (NA)	Binary (≥14 ng/L）	T2DM	1	MACE	1.85	1.48	2.32
Hendriks	2016	hs-cTnT (NA)	Continuous (HR per SD); tertiles(3/14 ng/L)	T2DM		All-cause mortality, cardiovascular mortality	1.14	0.99	1.3			1.17	1.07	1.3
Gori	2016	hs-cTnT (Roche Diagnostics)	Binary (≥14 ng/L）	Diabetes	1	MACE	1.96	1.57	2.46
Looker	2015	hs-TnT(RBM)	Continuous (OR per SD)	T2DM	1	MACE	1.57	1.4	1.78
Zellweger	2015	hs-cTnT (Roche Diagnostics)	Binary (14ng/L)	Diabetes with suspected AMI		All-cause mortality						4.05	1.38	11.91
Hillis	2014	hs-cTnT (Roche Diagnostics)	Continuous (HR per SD)	T2DM	1	MACE, all-cause mortality	1.29	1.17	1.42			1.3	1.18	1.44
Yiu	2014	hs-TnI (Abbott)	Binary (male: 8.5 ng/L, female: 7.6 ng/L)	T2DM	1	MACE, heart failure, cardiovascular mortality	2.85	1.15	7.03								4.88	1.12	21.31

## Sheet: unadjusted
Author	Year	Subunit of hs-cTn (Assay)	Coding of hs-cTn	Population	Outcomes of interest	MACE (CVD+mortality)					All-cause mortality					Heart failure
						HR	95%CI ll	95%CI ul	ln(HR)	SE(ln(HR))	HR	95%CI ll	95%CI ul	ln(HR)	SE(ln(HR))	HR	95%CI ll	95%CI ul	ln(HR)	SE(ln(HR))
Witkowski	2021	hs-cTnT (Roche Diagnostics)	Quartiles (8.2/13/21.6 ng/L)	Prediabetes	MACE, all-cause mortality
Saeed	2021	hs-cTnT (Roche Diagnostics)	Continuous (HR per SD)	T1DM	Incidence IHD event	1.3	1.09	1.55	0.262364	0.345036
Pandey	2021	hs-cTnT (Roche Diagnostics)	Continuous (HR per SD); binary (6 ng/L)	Prediabetes	Heart failure
Pandey	2022	hs-cTnT (Roche Diagnostics)	Continuous (HR per SD); binary (6 ng/L)	Diabetes	Heart failure
Busch	2021	hs-cTnI (Snibe Diagnostics)	Continuous (HR per SD)	T2DM	MACE	1.12	0.79	1.59
Tang	2020	hs-cTnI (Abbott Diagnostics)	Continuous (HR per log2); binary (≥9.2 ng/L）	Diabetes	All-cause mortality
Tang	2020	hs-cTnT (Roche Diagnostics)	Continuous (HR per log2); binary (≥24 ng/L）	Diabetes	All-cause mortality
Sharma	2020	hs-cTnI (Abbott Diagnostics)	Continuous (HR per log2)	T2DM with recent ACS	MACE
Nguyen	2020	hs-cTnT (Roche Diagnostics)	Continuous (HR per SD); Quartiles	Prediabetes	Incidence IHD event, Heart failure
Nguyen	2020	hs-cTnT (Roche Diagnostics)	Continuous (HR per SD); Quartiles	Diabetes	Incidence IHD event, Heart failure
Costacou (gender subgroup)	2020	hs-cTnT (Roche Diagnostics)	Continuous (HR per SD); Quartiles	T1DM	MACE
Wong	2019	hs-cTnI (Abbott Diagnostics)	Continuous (HR per SD)	T2DM with stable CAD	MACE	2.01	1.64	2.47
Keller	2018	hs-cTnT (Roche Diagnostics)	Quartiles (35/55/90 ng/L)	T2DM with hemodialysis	all-cause mortality, incident CVD
Colombo	2018	hs-cTnT (Glasgow Biomarker Laboratory)	Continuous (HR per SD)	T2DM	Incident CVD
Price	2017	hs-cTnT (Roche Diagnostics)	Continuous (OR per SD)	T2DM	Incident CVD
Ohkuma	2017	hs-cTnT (Roche Diagnostics)	Continuous (HR per SD)	T2DM	Heart failure
Galsgaard	2017	hs-cTnT (Roche Diagnostics)	Continuous (HR per doubling)	T1DM	incident CVD, all-cause mortality						1.64	1.5	1.79
Bidadkosh	2017	hs-cTnT (Roche Diagnostics)	Continuous (HR per doubling)	T2DM with nephropathy	Incidence CVD event
Scirica	2016	hs-cTnT (Roche Diagnostics)	Continuous (HR per SD)	T2DM	MACCE, Cardiovascular death,myocardial infarction, ischemic stroke, and hospitalization for heart failure (HF)
Resl	2016	hs-cTnT (Roche Diagnostics)	Continuous (HR per SD)	T2DM	Composite endpoint of unplanned hospitalisation for cardiovascular disease or death
Junttila	2016	hs-cTnT (NA)	Binary (≥14 ng/L）	T2DM	Composite endpoint of cardiovascular death, myocardial infarction and stroke
Hendriks	2016	hs-cTnT (NA)	Continuous (HR per SD); tertiles(3/14 ng/L)	T2DM	All-cause mortality, cardiovascular mortality
Gori	2016	hs-cTnT (Roche Diagnostics)	Continuous (HR per SD)	Diabetes	Incident CVD
Looker	2015	hs-TnT(RBM)	Continuous (OR per SD)	T2DM	Incident CVD
Zellweger	2015	hs-cTnT (Roche Diagnostics)	Binary (14ng/L); Continuous (HR per SD) from KM curves	Diabetes with suspected AMI	All-cause mortality						8.48	3.02	23.79
Hillis	2014	hs-cTnT (Roche Diagnostics)	Continuous (HR per SD)	T2DM	Cardiovascular events,all-cause mortality
Yiu	2014	hs-TnI (Abbott)	Binary (male: 8.5 ng/L, female: 7.6 ng/L); Continuous (HR per SD) from KM curves	T2DM	MACE,heart failure,myocardial infarction,cardiovascular mortality		5.69	3.05	10.62		15.9	3.62	71.87				7.21	2.7	19.25
