# Supplementary material for: Prognostic value of high-sensitivity cardiac troponin for major adverse cardiovascular events in patients with diabetes: a systematic review and meta-analysis
Source: PeerJ. 2023 Nov 13;11:e16376. doi: 10.7717/peerj.16376 (PMC10652853; doi:10.7717/peerj.16376)
Supplement: Supplemental Information 5 [file peerj-11-16376-s005.xlsx]

## Sheet: MACE
Author	Year	Subunit of hs-cTn (Assay)	Coding of hs-cTn	Population	sample size	outcome at beginning	Adjusted	MACE (CVD+mortality)
								HR	95%CI ll	95%CI ul	ln(HR)	SE(ln(HR))
Bluro	2021	hs-cTnT (Roche Diagnostics)	Binary (14 ng/L)	T2DM	482	1	1	2.58	0.95	7.06	0.947789	1.96562
Bidadkosh	2017	hs-cTnT (Roche Diagnostics)	Continuous (HR per doubling)	T2DM with nephropathy	861	1	2	1.25	0.92	2.3	0.223144	0.897965
Cimaglia	2021	hs-cTnT (Roche Diagnostics)	Binary (25 ng/L）	T2DM with CLI	618	0	1	2.29	1.21	4.34	0.828552	1.25171
Bluro	2021	hs-cTnT (Roche Diagnostics)	Continuous (HR per SD)	T2DM	482	1	1	1.04	1	1.08	0.0392207	0.0754218
Busch	2021	hs-cTnI (Snibe Diagnostics)	Continuous (HR per SD)	T2DM	1030	1	0	1.12	0.79	1.59	0.113329	0.685467
Gori	2016	hs-cTnT (Roche Diagnostics)	Binary (14 ng/L)	Diabetes	1510	1	2	1.96	1.57	2.46	0.672944	0.440104
Colombo	2018	hs-cTnT (Glasgow Biomarker Laboratory)	Continuous (HR per SD)	T2DM	2105	1	2	1.4	1.16	1.69	0.336472	0.368782
Costacou (gender subgroup)	2020	hs-cTnT (Roche Diagnostics)	Continuous (HR per SD)	T1DM	581	1	2	1.23	0.97	1.15	0.207014	0.166817
Galsgaard	2017	hs-cTnT (Roche Diagnostics)	Continuous (HR per doubling)	T1DM without nephropathy	442	1	2	1.06	0.92	1.21	0.0582689	0.268522
Hendriks	2016	hs-cTnT (NA)	Binary (3 ng/L）	T2DM	1133	1	2	1.4	0.94	2.07	0.336472	0.773636
Galsgaard	2017	hs-cTnT (Roche Diagnostics)	Continuous (HR per doubling)	T1DM with nephropathy	458	1	2	1.14	1.02	1.26	0.131028	0.207083
Hendriks	2016	hs-cTnT (NA)	Continuous (HR per SD)	T2DM	1133	1	2	1.14	0.99	1.3	0.131028	0.266966
Junttila	2016	hs-cTnT (NA)	Binary (14 ng/L)	T2DM	2285	0	2	1.85	1.48	2.32	0.615186	0.440535
Hillis	2014	hs-cTnT (Roche Diagnostics)	Continuous (HR per SD)	T2DM	3862	0	2	1.29	1.17	1.42	0.254642	0.18978
Looker	2015	hs-TnT(RBM)	Continuous (OR per SD)	T2DM	2318	1	2	1.57	1.4	1.78	0.451076	0.235338
Nguyen	2020	hs-cTnT (Roche Diagnostics)	Continuous (HR per SD)	Prediabetes	799	1	2	1.24	1.04	1.48	0.215111	0.345765
Nguyen	2020	hs-cTnT (Roche Diagnostics)	Continuous (HR per SD)	Diabetes	695	1	2	1.39	1.22	1.6	0.329304	0.26573
Price	2017	hs-cTnT (Roche Diagnostics)	Continuous (OR per SD)	T2DM	1049	1	2	1.35	1.02	1.49	0.300105	0.371394
Resl	2016	hs-cTnT (Roche Diagnostics)	Continuous (HR per SD)	T2DM	746	1	2	1.57	1.25	1.98	0.451076	0.450754
Saeed	2021	hs-cTnT (Roche Diagnostics)	Continuous (HR per SD)	T1DM	295	1	1	1.23	0.98	1.55	0.207014	0.449288
Keller	2018	hs-cTnT (Roche Diagnostics)	Binary (35 ng/L)	T2DM with hemodialysis	1034	0	2	1.35	1.01	1.82	0.300105	0.577108
Scirica	2016	hs-cTnT (Roche Diagnostics)	Continuous (HR per SD)	T2DM	16492	0	2	1.41	1.32	1.51	0.34359	0.131788
Nguyen	2020	hs-cTnT (Roche Diagnostics)	Binary (4.5 ng/L）	Prediabetes/Diabetes	1494	1	2	1.48	1	2.18	0.392042	0.763738
Witkowski	2021	hs-cTnT (Roche Diagnostics)	Binary (13 ng/L)	Prediabetes	2631	1	2	1.65	1.14	2.39	0.500775	0.72546
Sharma	2020	hs-cTnI (Abbott Diagnostics)	Continuous (HR per log2)	T2DM with recent ACS	5154	0	2	1.04	1	1.09	0.0392207	0.0844541
Wong	2019	hs-cTnI (Abbott Diagnostics)	Continuous (HR per SD)	T2DM with stable CAD	1617	0	2	1.75	1.41	2.17	0.559616	0.422515
Yiu	2014	hs-cTnI (Abbott Diagnostics)	Binary (male: 8.5 ng/L, female: 7.6 ng/L)	T2DM	276	0	2	2.85	1.15	7.03	1.04732	1.77422
					51582

## Sheet: HF
Author	Year	Subunit of hs-cTn (Assay)	Coding of hs-cTn	Population	sample size	outcome at beginning	Adjusted	Heart failure
								HR	95%CI ll	95%CI ul	ln(HR)	SE(ln(HR))
Nguyen	2020	hs-cTnT (Roche Diagnostics)	Continuous (HR per SD)	Prediabetes	799	1	2	1.17	0.85	1.61	0.157004	0.625978
Pandey	2021	hs-cTnT (Roche Diagnostics)	Binary (6 ng/L)	Prediabetes	4543	1	2	1.41	1.14	1.73	0.34359	0.408751
Nguyen	2020	hs-cTnT (Roche Diagnostics)	Continuous (HR per SD)	Diabetes	695	1	2	1.63	1.36	1.96	0.48858	0.358151
Pandey	2021	hs-cTnT (Roche Diagnostics)	Binary (6 ng/L)	Diabetes	2256	1	2	1.69	1.37	2.08	0.524729	0.409206
Ohkuma	2017	hs-cTnT (Roche Diagnostics)	Continuous (HR per SD)	T2DM	3098	0	2	1.12	0.94	1.34	0.113329	0.347454
Pandey	2021	hs-cTnT (Roche Diagnostics)	Continuous (HR per SD)	Prediabetes	4543	1	2	1.19	1.08	1.32	0.173953	0.196657
Nguyen	2020	hs-cTnT (Roche Diagnostics)	Binary (≥4.5 ng/L）	Diabetes	695	1	2	5.21	1.54	17.65	1.65058	2.39017
Pandey	2021	hs-cTnT (Roche Diagnostics)	Continuous (HR per SD)	Diabetes	2256	1	2	1.42	1.28	1.57	0.350657	0.200131
Scirica	2016	hs-cTnT (Roche Diagnostics)	Continuous (HR per SD)	T2DM	16492	0	2	1.39	1.26	1.55	0.329304	0.203
Yiu	2014	hs-TnI (Abbott)	Binary (male: 8.5 ng/L, female: 7.6 ng/L)	T2DM	276	0	2	4.88	1.12	21.31	1.58515	2.88693
					35653
